# Supplementary material for: Constitutively elevated levels of SOCS1 suppress innate responses in DF-1 immortalised chicken fibroblast cells
Source: PubMed Central journal article supplement (PMC5727488; doi:10.1038/s41598-017-17730-2), 2017-12-13

## **Supplementary Info**

### **Constitutively elevated levels of SOCS1 suppress innate responses in DF-1 immortalised chicken fibroblast cells**

**Efstathios S. Giotis**

**Craig S. Ross**

**Rebecca C. Robey**

**Axel Nohturfft**

**Stephen Goodbourn**

**Michael A. Skinner**

**Supplementary Table 1:** Excel workbook file (.XLS) with 5 spreadsheets showing **Full lists of differentially regulated genes determined by 5 comparisons of 6 different conditions analysed by microarray, as summarised in Fig. 1.** Each individual tab shows one of the following comparisons: (a) chIFN- $\alpha$  stimulated versus mock-treated CEFs, (b) chIFN- $\alpha$  stimulated versus mock-treated DF-1, (c) IBDV-infected versus mock-treated CEFs, (d) IBDV-infected versus mock-treated DF-1 and (e) mock-treated DF-1 versus mock-treated CEFs. Headings are: Probeset ID, Gene Symbol, Gene Title, RefSeq Transcript ID, p-value (FDR) and Fold-change.

**Supplementary Table 2:** Excel workbook file (.XLS) with spreadsheets showing **gene set enrichment analysis (using MetaCore) for comparison between untreated DF-1 and CEFs.**

MetaCore (Clarivate Analytics) was used to perform gene set enrichment analysis of the differentially regulated genes with functional Gene Ontologies (GO) and biological processes. The probability of a random intersection between a set of genes with ontology processes was estimated with the “P” value of the hypergeometric intersection. Each individual tab shows one of the following analyses: (a) enrichment by pathway maps, (b) enrichment by process networks, (c) enrichment by GO processes, and (d) enrichment by protein function as well as (e) a list of transcription factors whose targets are overrepresented in the differentially expressed gene list. Keys to column headings for tabs (d) and (e) appear in columns L-M and M-N, respectively.

**Supplementary Table 3:** Excel spreadsheet workbook file (.XLS) with worksheets showing results of **Motif-Search Analysis of the Chicken SOCS1 Promoter** (with minimum scores of 80 and 90%) showing the coordinates of the transcription factor binding sites (TFBSs) within the promoter (SOCS1p) and statistical significance (score). The “+” and “-” signs within brackets indicate the strand orientation of the TFBS.

**Supplementary Table 4: Table showing real-time quantitative RT-PCR primers.**

| <b>mRNA target</b>             | <b>NCBI accession</b> | <b>Forward primer (5' to 3')</b> | <b>Reverse primer (5' to 3')</b> |
|--------------------------------|-----------------------|----------------------------------|----------------------------------|
| <b>GAPDH</b>                   | NM_204305.1           | GGCACTGTCAAGGCTGAGAA             | TGCATCTGCCCATTTGATGT             |
| <b>IFITM3</b>                  | XM_001233949.3        | CTATTCCCATCTCTCCGCAGC            | AGATCTTCGCTGTCCTCCCA             |
| <b>IFIT5</b>                   | XM_421662.4           | TGCTTCACCAGCTAGGACTCTGC          | TGGCTTTTGCTCTGTCACCACTTTG        |
| <b>IFN-<math>\alpha</math></b> | EU367971.1            | CCACCGCTACACCCAGCACC             | ATGGCGAGGTGAAGGTTGCGA            |
| <b>IFN-<math>\beta</math></b>  | GU119897.1            | CAGTCTCCAGGGATGCACAG             | GAGAAGGTGGTGGTGAGAGC             |
| <b>IL15</b>                    | NM_204571.1           | CACTGTAAGTGGTCAGACGTTCTGA        | GGTTCCTGGCATTCTATATCCTCGT        |
| <b>IRF7</b>                    | NM_205372.1           | CCATCCCCGGCTGAGGAGCT             | CAGCGGCTGTCGTCCACCTG             |
| <b>IRF8</b>                    | NM_205416.1           | AGCCCCTCTTTGCCCTGGT              | GCTGAGGGACAGCCTGCAGC             |
| <b>ISG12-2</b>                 | NM_001001296.5        | TGACCAGAACGTCCACAAAGCCG          | ACCTGCTCCTGGACCGATGCTT           |
| <b>MDA5</b>                    | NM_001193638          | AAGATGAAGCAGAGGGCAGA             | CCACTGCCTGTAGGGAGACA             |
| <b>MX1</b>                     | NM_204609             | CACACCCAAGTGTGAGCGAT             | ATGTCCGAAACTCTCTGCGG             |
| <b>RSAD2</b>                   | XM_426208             | GGACAAGGACGAGACAGTTCC            | TCCCGCCTCCTTAAGCATTG             |
| <b>SOCS1</b>                   | NM_001137648.1        | CTGCTGGATGCCTGCGGCTT             | GGGCCCCGGTCGCGGTTTTAA            |
| <b>TGFB2</b>                   | NM_001031045          | CAACCCGAGCTCCAAGCGCA             | AGCCCCGCGTCTGCACATTC             |
| <b>STAT1</b>                   | NM_001012914.1        | ACTGCATGCATTGGTGGCCCA            | GCTGACGAACTTGCTGCAGGC            |
| <b>IBDV VP4</b>                | M97346                | GGCTGGTCCCGGAGCATTTCG            | GGTCCACGTTGGCTGCTGCT             |
| <b>NAF1</b>                    | XM_015285318.1        | GAGTGTGAGGTGGAAGTGATT            | TTCAGTATCGTGGGATGTTGTAG          |
| <b>ARFGAP3</b>                 | XM_015290471.1        | GCATCACCTCAACACAAAGAAG           | GCTGGTTCTGGCTCTGATAATA           |

**Supplementary Table 5:** Excel spreadsheet workbook file (.XLS) with worksheets showing **Information on Deposited Microarray Data.** Data (.CEL) files as deposited in ArrayExpress for current (E-MTAB-4028) and previous (E-MTAB-3711) studies.

**Supplementary Figure S1: Sodium butyrate induces SOCS1 expression in CEFs (but not DF-1) and enhances IBDV VP4 RNA expression in CEFs.** For the optimization step **(A)**, a time course study was carried out using three concentrations of sodium butyrate (0.5mM, 1.0mM and 2.0mM) over 18 hours. SOCS1 expression was then quantified by qRT-PCR. Addition of 2.0mM of sodium butyrate (SB) yielded a 2.5-fold increase in SOCS1 expression in CEFs after 18 hours. **(B)** In the presence of sodium butyrate (2 mM) DF-1 were infected with IBDV for 2 h then incubated for 16 h. Incubation of DF-1 with sodium butyrate did not induce any significant changes in SOCS1 transcript levels. Sodium butyrate significantly enhanced the expression levels of VP4 transcripts **(C)**, SOCS1 mRNA **(D)** and ISGs such as IFIT5 **(E)** in IBDV-infected CEFs 18h post infection. All qRT-PCR data are from three independent experiments and are expressed as mean  $\pm$  SEM. An unpaired t-test with Welch's correction (Two-tailed) was used in A-D (\*\*, P <0.01) and in E a Two-way Anova with Bonferroni's comparison test was used to analyse the data (\*\*\*\*, P <0.0001).

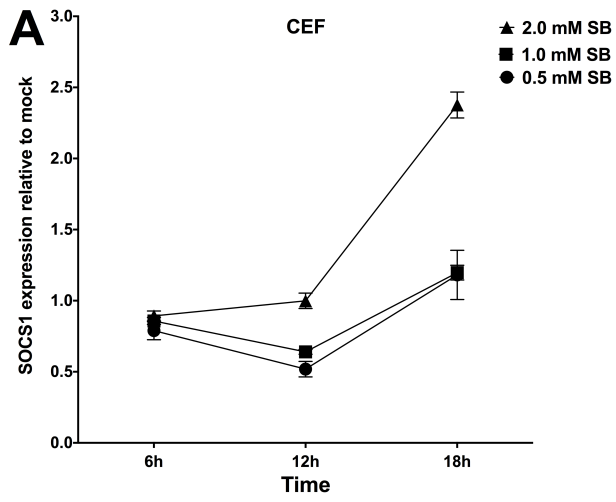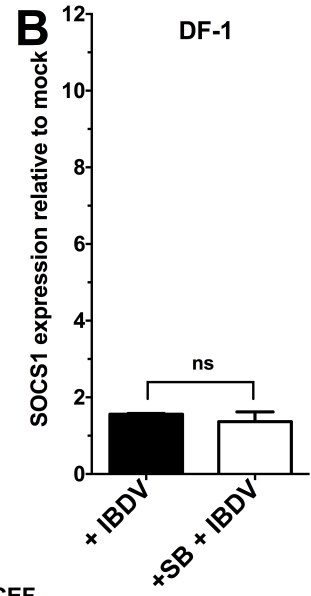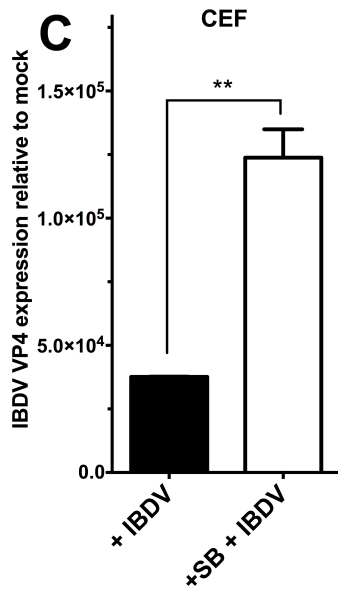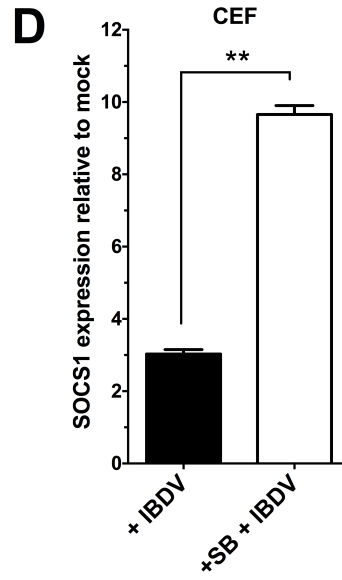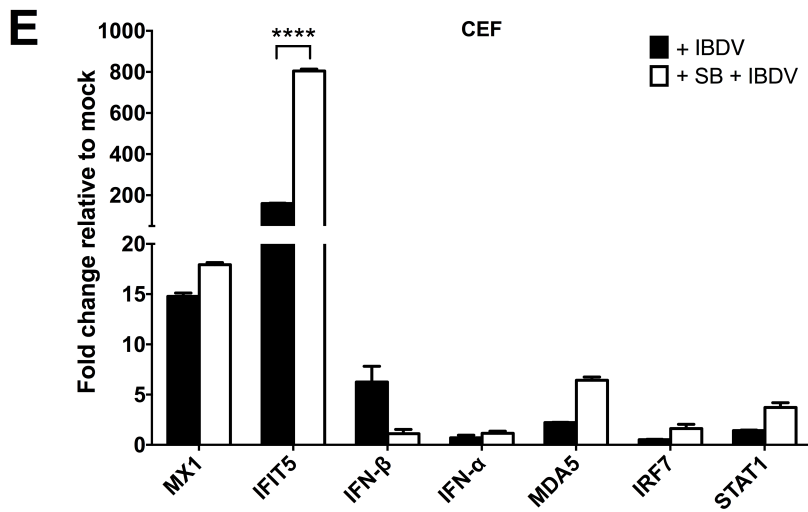



**Supplementary Figure S2: Overexpression of SOCS1 inhibits IBDV-induced STAT1 phosphorylation in DF-1 cells.** DF-1 cells were either mock-transfected or transfected with a SOCS1 expression vector for 48h and then infected with the IBDV PBG98 strain, at an MOI of 5, for 16h. Total protein lysates were subjected to Western blot analysis using anti-IBDV VP2/3 (Skinner MA, unpublished), anti-STAT1 (BD Biosciences), anti-phospho STAT1 (Millipore), anti-SOCS1 (Sigma) and anti-GAPDH (Ambion) antibodies. Full-length blots for these cropped images are presented in Supplementary Fig. S5 online.

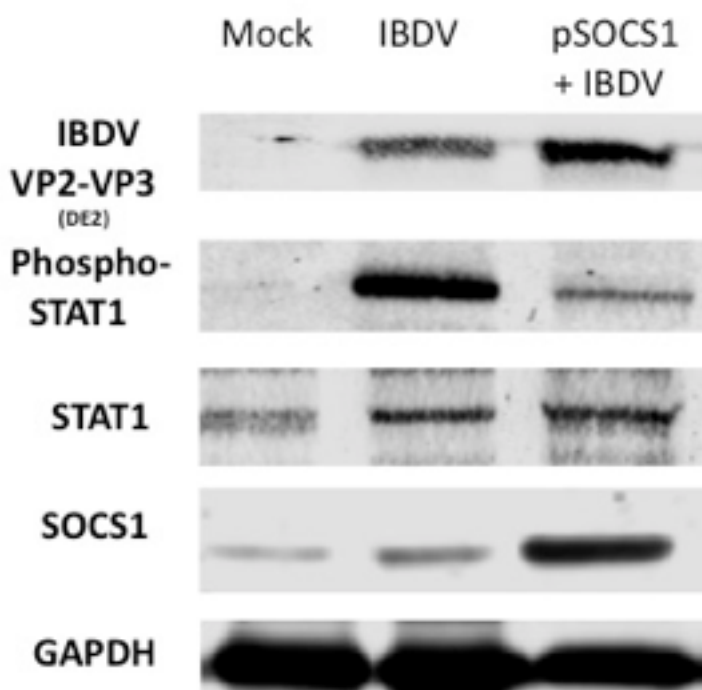

**Supplementary Figure S3:** BLAST analysis of 19 base siSOCS1 sequence against Gallus gallus nucleotide sequences at NCBI. (A) Top 9 hits (of 171 from default maximum 100 sequences). The top 4 all represent SOCS1; the fifth is from a non-coding genomic scaffold; the next 4 represent NAF1 and ARFGAP3. (B) The SOCS1 hit showing 19/19 base identity. (C) NAF1 and ARFGAP3 hits showing 15/19 base identity.

| A | Description                                                                                                         | Max score | Total score | Query cover | E value | Ident | Accession                      |
|---|---------------------------------------------------------------------------------------------------------------------|-----------|-------------|-------------|---------|-------|--------------------------------|
|   | PREDICTED: Gallus gallus suppressor of cytokine signaling 1 (SOCS1), transcript variant X1, mRNA                    | 38.2      | 38.2        | 100%        | 0.006   | 100%  | <a href="#">XM_015294233.1</a> |
|   | Gallus gallus suppressor of cytokine signaling 1 (SOCS1), mRNA                                                      | 38.2      | 38.2        | 100%        | 0.006   | 100%  | <a href="#">NM_001137648.1</a> |
|   | Gallus gallus finished cDNA, clone CHEST512p4                                                                       | 38.2      | 38.2        | 100%        | 0.006   | 100%  | <a href="#">BX933215.2</a>     |
|   | Gallus gallus finished cDNA, clone CHEST419m16                                                                      | 38.2      | 38.2        | 100%        | 0.006   | 100%  | <a href="#">BX932033.1</a>     |
|   | Gallus gallus BAC clone CH261-57M24 from chromosome z, complete sequence                                            | 32.2      | 105         | 84%         | 0.36    | 100%  | <a href="#">AC197851.3</a>     |
|   | PREDICTED: Gallus gallus nuclear assembly factor 1 ribonucleoprotein (NAF1), transcript variant X2, misc_RNA        | 30.2      | 30.2        | 78%         | 1.4     | 100%  | <a href="#">XR_001466252.1</a> |
|   | PREDICTED: Gallus gallus nuclear assembly factor 1 ribonucleoprotein (NAF1), transcript variant X1, mRNA            | 30.2      | 30.2        | 78%         | 1.4     | 100%  | <a href="#">XM_015285318.1</a> |
|   | PREDICTED: Gallus gallus ADP-ribosylation factor GTPase activating protein 3 (ARFGAP3), transcript variant X2, mRNA | 30.2      | 30.2        | 78%         | 1.4     | 100%  | <a href="#">XM_015290471.1</a> |
|   | PREDICTED: Gallus gallus ADP-ribosylation factor GTPase activating protein 3 (ARFGAP3), transcript variant X1, mRNA | 30.2      | 30.2        | 78%         | 1.4     | 100%  | <a href="#">XM_015290461.1</a> |

**B** PREDICTED: Gallus gallus suppressor of cytokine signaling 1 (SOCS1), transcript variant X1, mRNA  
Sequence ID: [XM\\_015294233.1](#) Length: 1077 Number of Matches: 1  
Range 1: 473 to 491

| Score         | Expect  | Identities  | Gaps     | Strand    | Frame |
|---------------|---------|-------------|----------|-----------|-------|
| 38.2 bits(19) | 0.006() | 19/19(100%) | 0/19(0%) | Plus/Plus |       |

Features:

```
Query 1   CGCAGAAGAATTGTTTCTT 19
Sbjct 473 CGCAGAAGAATTGTTTCTT 491
```

**C** PREDICTED: Gallus gallus nuclear assembly factor 1 ribonucleoprotein (NAF1), transcript variant X1, mRNA  
Sequence ID: [XM\\_015285318.1](#) Length: 10444 Number of Matches: 1  
Range 1: 5483 to 5497

| Score         | Expect | Identities  | Gaps     | Strand    | Frame |
|---------------|--------|-------------|----------|-----------|-------|
| 30.2 bits(15) | 1.4()  | 15/15(100%) | 0/15(0%) | Plus/Plus |       |

Features:

```
Query 5   GAAGAATTGTTTCTT 19
Sbjct 5483 GAAGAATTGTTTCTT 5497
```

PREDICTED: Gallus gallus ADP-ribosylation factor GTPase activating protein 3 (ARFGAP3), transcript variant X2, mRNA  
Sequence ID: [XM\\_015290471.1](#) Length: 2707 Number of Matches: 1  
Range 1: 2225 to 2239

| Score         | Expect | Identities  | Gaps     | Strand     | Frame |
|---------------|--------|-------------|----------|------------|-------|
| 30.2 bits(15) | 1.4()  | 15/15(100%) | 0/15(0%) | Plus/Minus |       |

Features:

```
Query 2   GCAGAAGAATTGTTT 16
Sbjct 2239 GCAGAAGAATTGTTT 2225
```

**Supplementary Figure S4: siSOCS1 does not suppress levels of NAF1 & ARFGAP3 RNA.** DF-1 cells were mock transfected or transfected with siRNA specific for SOCS1 for 42h and treated with chIFN- $\alpha$  (1000 units/ml) for 6h or infected with the IBDV PBG98 strain for 16h. Extracted total RNA was subjected to reverse transcription followed by quantitative PCR using specific primer sets for SOCS1, NAF1 or ARFGAP3, normalized against GAPDH (using the  $\Delta\Delta C_t$  method). Data in A-F are representative from three independent experiments.

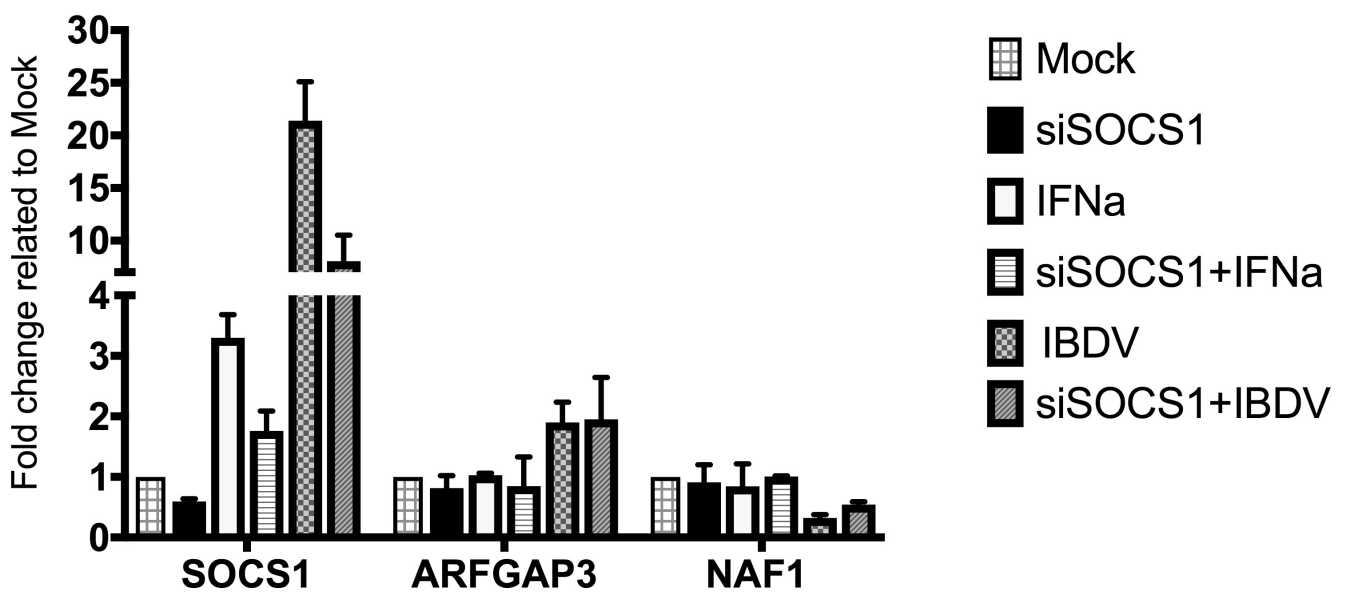

**Supplementary Figure S5: Full-size blots.** Un-cropped images for Figure 3 (G) & (H), Figure 4 (C) and Supplementary Fig S2. Details are as described in legends for those Figures.

Figure 3G

HA-SOCS1  
Empty Vector  
Mock  
HA-SOCS1

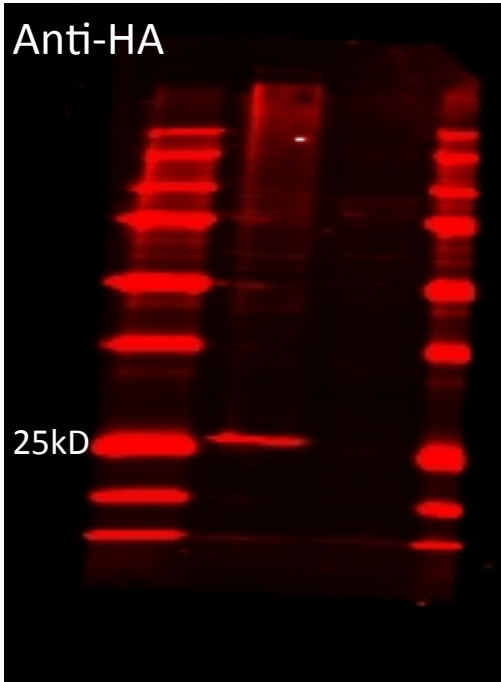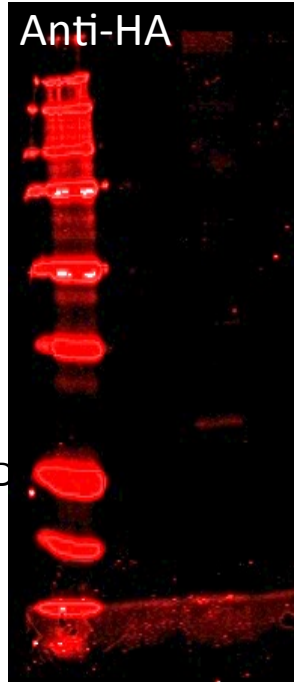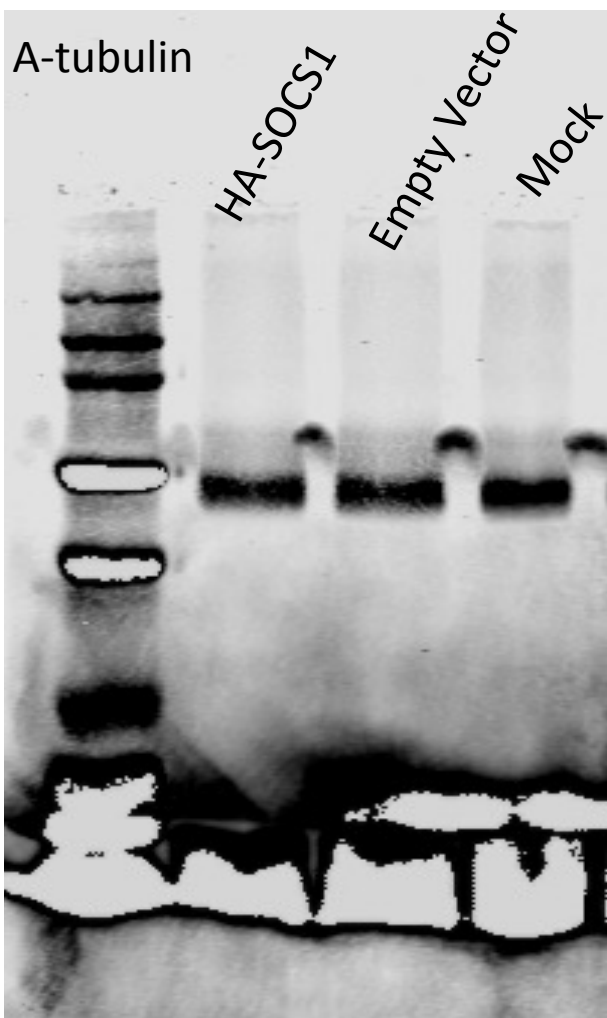

Figure 3H

**cSOCS1 siRNA**

|             |   |   |   |   |
|-------------|---|---|---|---|
| FLAG-pL2    | + |   | + |   |
| FLAG-cSOCS1 |   | + |   | + |
| siRNA ctl   | + | + |   |   |
| siRNA SOCS1 |   |   | + | + |

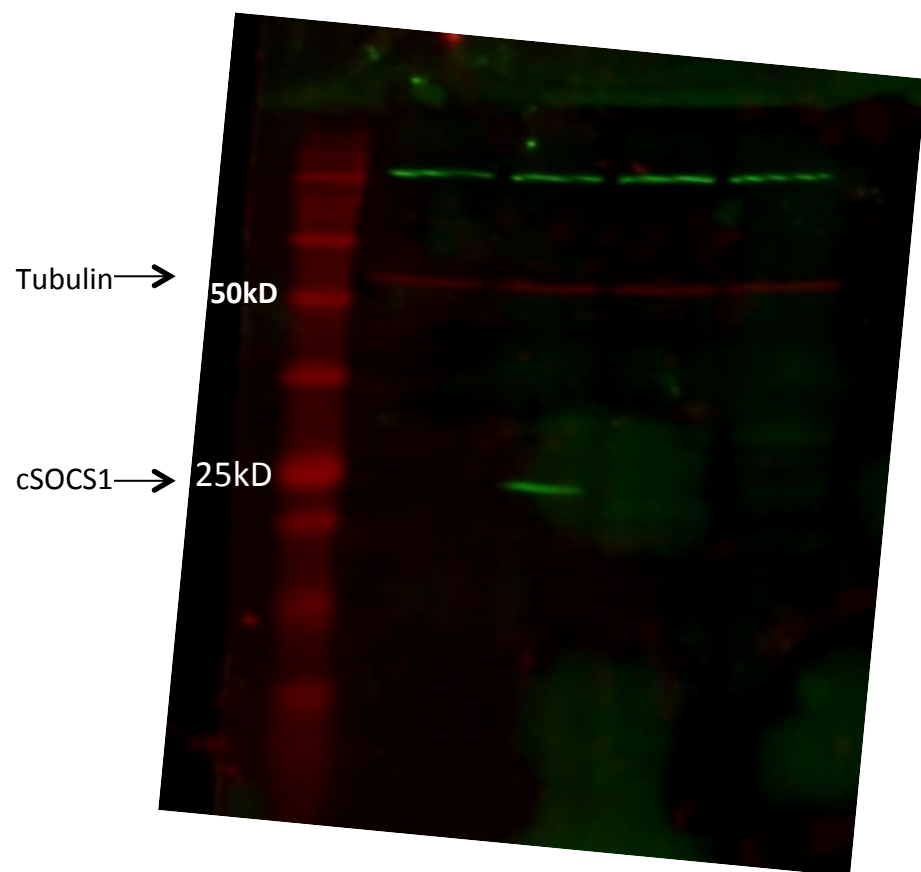

Figure 4C

### Mutant cSOCS1 expression

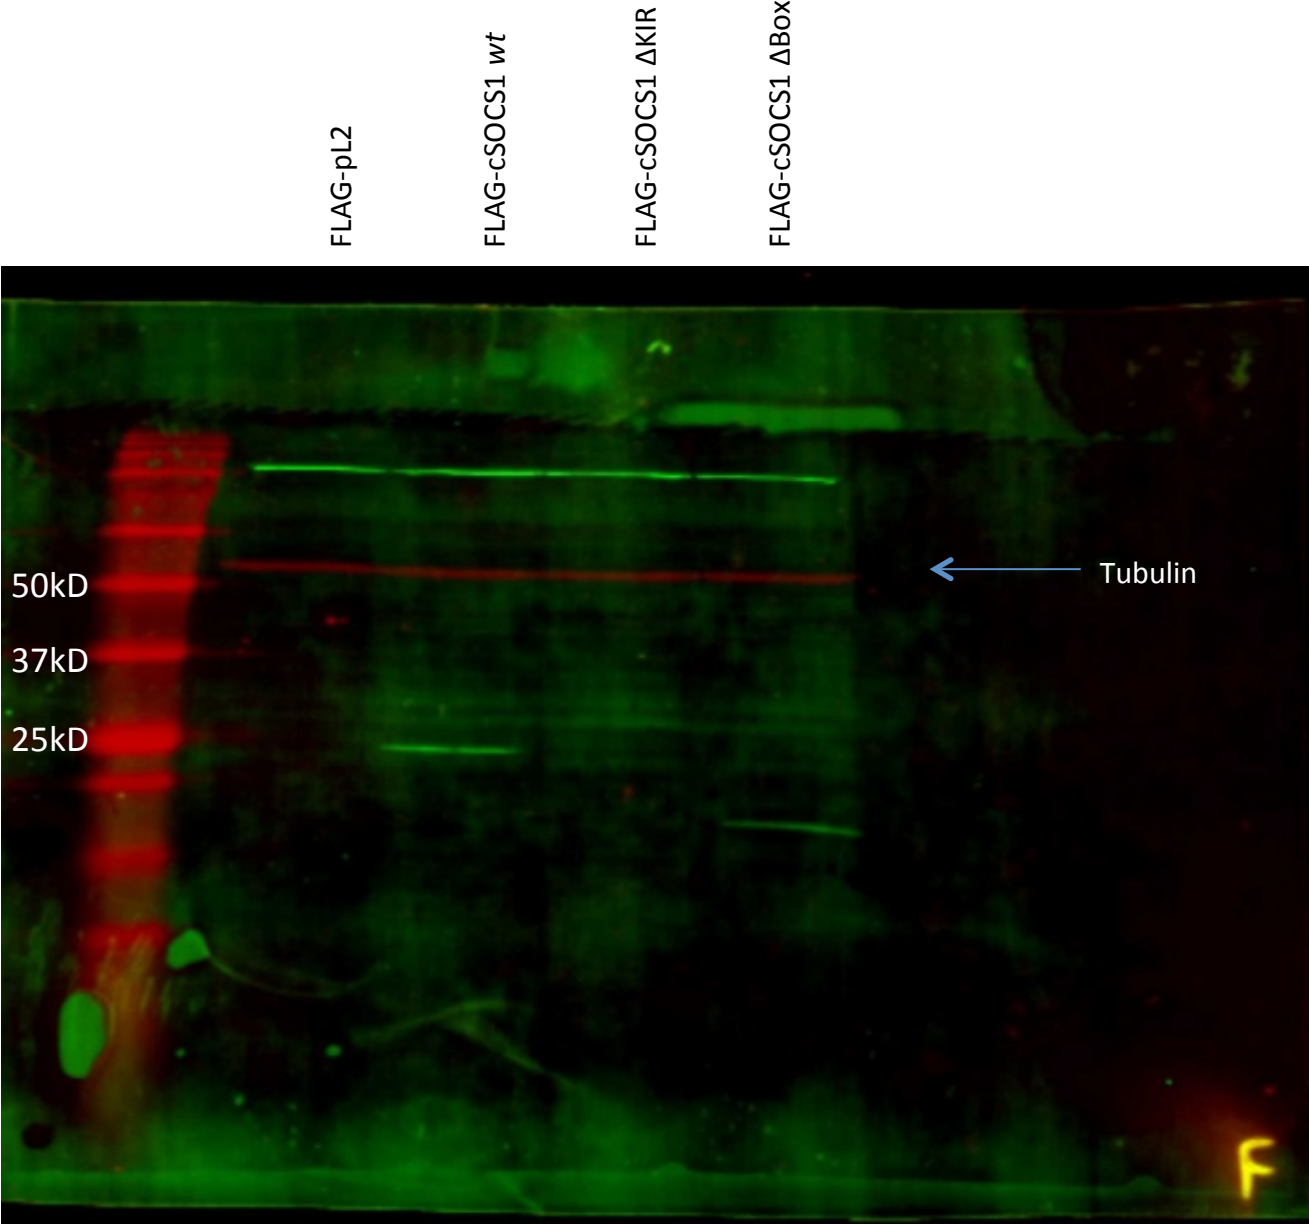

Figure S4

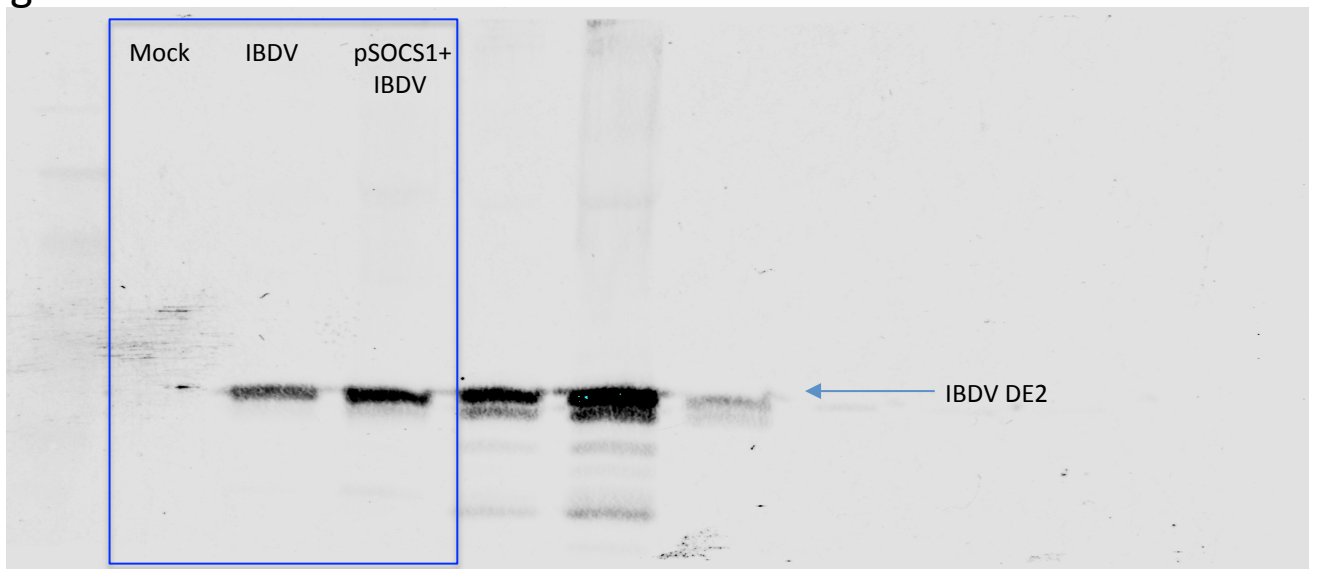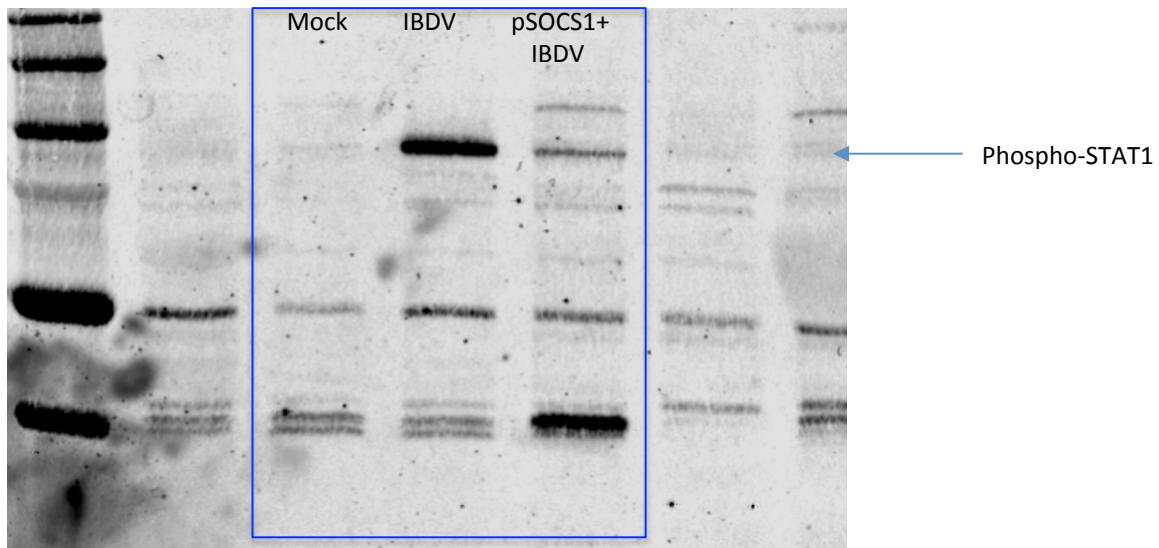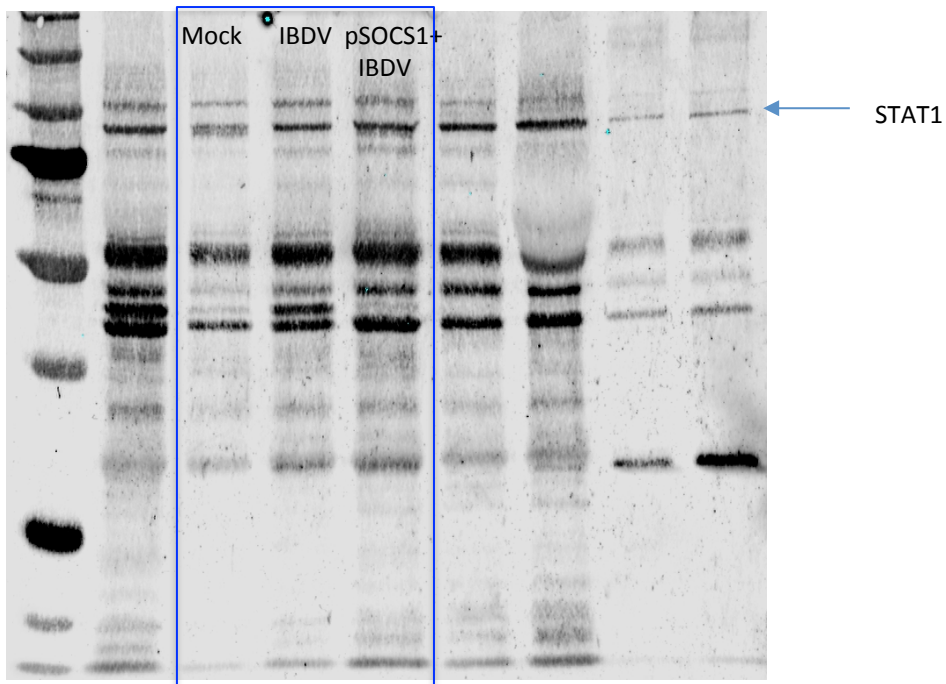



Figure S4

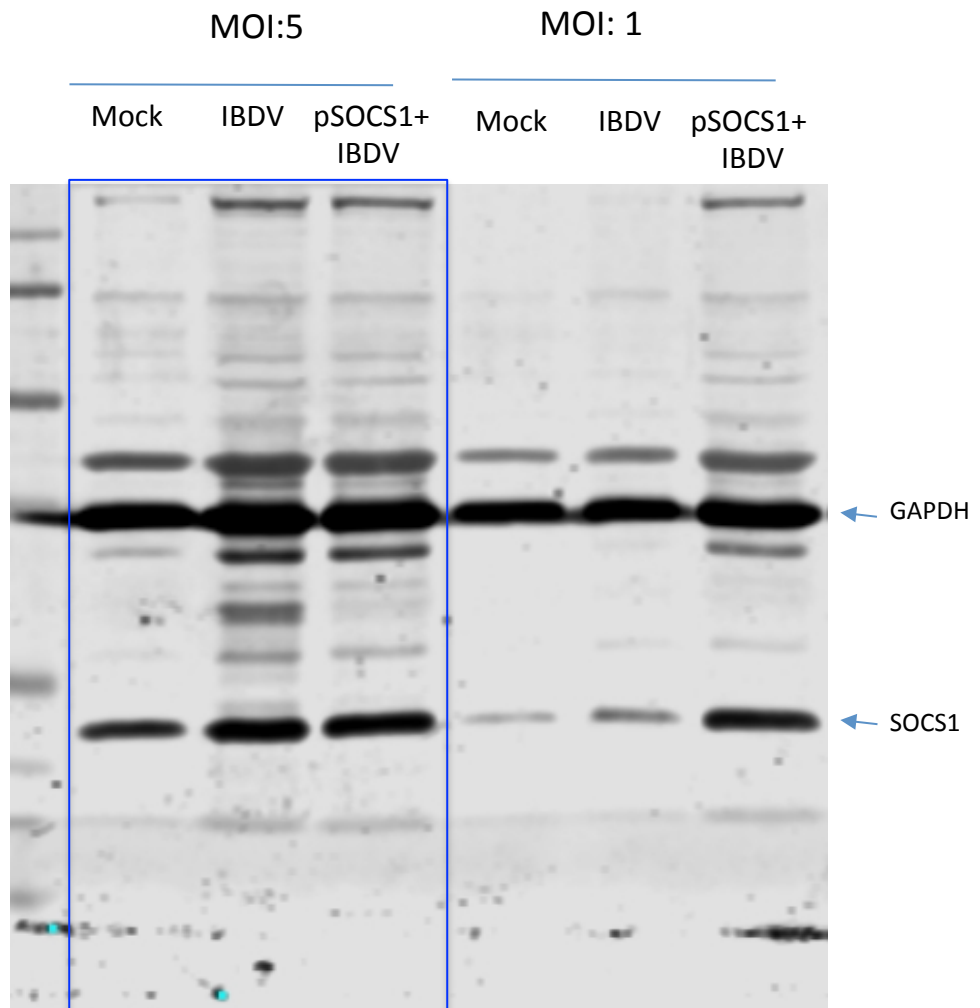

Supplement: 41598_2017_17730_MOESM1_ESM.pdf [file 41598_2017_17730_MOESM1_ESM.pdf]
